# Supplementary material for: Acceptance of COVID-19 Vaccination and its Related Factors Among HIV/AIDS Patients in Guangxi, China: A Cross-Sectional Survey.
Source: Research Square preprint supplement (doi:10.21203/rs.3.rs-1109933/v1), 2022-01-03
Supplement: Supplementary file 1 [file e84ca89baa08a1d67ea9e0b4.pdf]

**Table 1** Demographic characteristics of 903 subjects in Guangxi, China

| <b>Variables</b>                               | <b>Patients, No. (%) (n=903)</b> |
|------------------------------------------------|----------------------------------|
| <b>ender</b>                                   |                                  |
| Male                                           | 578(64.0)                        |
| Female                                         | 325(36.0)                        |
| <b>Age</b>                                     |                                  |
| 18-40                                          | 252(27.9)                        |
| 41-59                                          | 430(47.6)                        |
| ≥60                                            | 221(24.5)                        |
| <b>Ethnicity</b>                               |                                  |
| Han                                            | 564(62.5)                        |
| Zhuang                                         | 328(36.3)                        |
| Other Minorities                               | 11(1.2)                          |
| <b>Occupations</b>                             |                                  |
| Farmer                                         | 575(63.7)                        |
| Domestic Service                               | 139(15.4)                        |
| Others/Uncertain                               | 189(20.9)                        |
| <b>Marital status</b>                          |                                  |
| Married                                        | 570(63.1)                        |
| Single, divorced or widowed                    | 326(36.1)                        |
| Others/Uncertain                               | 7(0.8)                           |
| <b>Highest level of education</b>              |                                  |
| Primary school or below                        | 332(36.8)                        |
| Middle school                                  | 425(47.1)                        |
| High school or above                           | 146(16.2)                        |
| <b>Body Mass Index (kg/m<sup>2</sup>)</b>      |                                  |
| 18.5-24.0                                      | 609(67.4)                        |
| <18.5 or >24.0                                 | 294(32.6)                        |
| <b>The history of serious chronic illness</b>  |                                  |
| Yes                                            | 85(9.4)                          |
| No                                             | 818(90.6)                        |
| <b>Transmission route</b>                      |                                  |
| Sexual transmission                            | 862(95.5)                        |
| Injecting drug abuse                           | 33(3.7)                          |
| Others/Uncertain                               | 8(0.9)                           |
| <b>CD4<sup>+</sup>T cell counts (cells/μL)</b> |                                  |
| <200                                           | 131(14.5)                        |
| 200-500                                        | 418(46.3)                        |
| >500                                           | 334(37.0)                        |
| Not-detected                                   | 20(2.2)                          |
| <b>Infection time</b>                          |                                  |
| <5                                             | 394(43.6)                        |
| 5-10                                           | 357(39.5)                        |

|                               |           |
|-------------------------------|-----------|
| >10                           | 152(16.8) |
| <b>ART</b>                    |           |
| Yes                           | 833(92.2) |
| No                            | 70(7.8)   |
| <b>Adverse effects of ART</b> |           |
| Yes                           | 96(10.5)  |
| No                            | 737(89.5) |

**Table 2** Effects of CD4 cell count on the willingness of COVID-19 vaccine with HIV infection for 903 subjects in the survey

| <b>Variables</b>                                              | <b>Patients, No.<br/>(n=903)</b> | <b><math>\beta</math></b> | <b>S.E.</b> | <b>OR</b> | <b>95%CI</b> | <b>P-Value</b> |
|---------------------------------------------------------------|----------------------------------|---------------------------|-------------|-----------|--------------|----------------|
| <b>CD4<sup>+</sup>T cells count (cells/<math>\mu</math>L)</b> |                                  |                           |             |           |              |                |
| <250                                                          | 186                              | Ref                       |             |           |              |                |
| 250-349                                                       | 155                              | .047                      | .254        | 1.048     | 0.637-1.723  | .854           |
| 350-500                                                       | 208                              | -.210                     | .229        | .810      | 0.518-1.269  | .358           |
| >500                                                          | 334                              | -.205                     | .209        | .815      | 0.541-1.226  | .325           |
| Not detect                                                    | 20                               | -.266                     | .517        | .767      | 0.278-2.111  | .607           |

**Table 3** Knowledge of the COVID-19 and its vaccine among HIV/AIDS patients

| <b>Variables</b>                                                                      | <b>Patients,<br/>No. (%) (n=903)</b> |
|---------------------------------------------------------------------------------------|--------------------------------------|
| <b>What are the main ways to learn about COVID-19?</b>                                |                                      |
| Phone                                                                                 | 618 (68.4)                           |
| TV                                                                                    | 536 (59.4)                           |
| Radio                                                                                 | 66 (7.3)                             |
| Newspaper                                                                             | 39 (4.3)                             |
| Chat                                                                                  | 314 (34.8)                           |
| Community                                                                             | 358 (39.6)                           |
| Others/Unknown                                                                        | 46 (5.1)                             |
| <b>What are the available vaccines in China?</b>                                      |                                      |
| Inactivated vaccine                                                                   | 404 (44.7)                           |
| mRNA vaccine                                                                          | 44 (4.9)                             |
| Adenovirus vaccine                                                                    | 19 (2.1)                             |
| Recombinant protein vaccine                                                           | 26 (2.9)                             |
| Unknown                                                                               | 410 (45.4)                           |
| <b>What do you think is the most appropriate age to receive the COVID-19 vaccine?</b> |                                      |
| < 18                                                                                  | 65 (7.2)                             |
| 18-40                                                                                 | 602 (66.7)                           |
| 41-59                                                                                 | 216 (23.9)                           |
| ≥60                                                                                   | 102 (11.3)                           |
| Unknown                                                                               | 167(18.5)                            |
| <b>Which type of occupation is preferential for COVID-19 vaccination?</b>             |                                      |
| medical personnel                                                                     | 671 (74.3)                           |
| Border workers                                                                        | 523 (57.9)                           |
| Courier / delivery / supermarket staff                                                | 360 (39.9)                           |
| COVID-19 patients/close contacts                                                      | 307 (34.0)                           |
| Migrant workers                                                                       | 140 (15.5)                           |
| Faculty and Students                                                                  | 222 (24.6)                           |
| Others/Unknown                                                                        | 76 (8.4)                             |

**Table 4** Attitude towards COVID-19 vaccination for WTV group

| <b>Variables</b>                                                                                         | <b>WTV Group,<br/>No. (%) (n=658)</b> |
|----------------------------------------------------------------------------------------------------------|---------------------------------------|
| <b>Which COVID-19 vaccine would you like to choose?</b>                                                  |                                       |
| Inactivated vaccine                                                                                      | 455(69.1)                             |
| mRNA vaccine                                                                                             | 11(1.7)                               |
| Adenovirus vaccine                                                                                       | 19(2.9)                               |
| Recombinant protein vaccine                                                                              | 7(1.1)                                |
| Others                                                                                                   | 36(5.5)                               |
| Unknown                                                                                                  | 130(19.8)                             |
| <b>Why do you want to receive the COVID-19 vaccine</b>                                                   |                                       |
| Fear of contracting COVID-19                                                                             | 500(76.0)                             |
| Relatives/friends are willing to accept vaccine                                                          | 264(40.1)                             |
| Fear of infecting family members with COVID-19                                                           | 227(34.4)                             |
| Vaccination can improve immunity                                                                         | 128(19.5)                             |
| Others                                                                                                   | 8(1.2)                                |
| <b>Would you still want to receive the COVID-19 vaccine if our country charged for it in the future?</b> |                                       |
| Yes                                                                                                      | 457(69.5)                             |
| No                                                                                                       | 198(30.1)                             |
| Look at the prices                                                                                       | 3(0.5)                                |
| <b>Do you still wear a mask after vaccination?</b>                                                       |                                       |
| Yes                                                                                                      | 587(89.2)                             |
| No                                                                                                       | 29(4.4)                               |
| Depends on the situation                                                                                 | 42(6.4)                               |

WTV: willingness to vaccination

**Table 5** Attitude towards COVID-19 vaccination for non-WTV group

| <b>Variables</b>                                                               | <b>Non-WTV Group<br/>No. (%) (n=245)</b> |
|--------------------------------------------------------------------------------|------------------------------------------|
| <b>Why don't you want to receive the COVID-19 vaccine?</b>                     |                                          |
| Have received pneumonia/influenza (non-COVID-19) vaccine                       | 2(0.8)                                   |
| Fear of vaccine side effects                                                   | 134(54.7)                                |
| Concern about little effect on HIV infected patients with COVID-19 vaccination | 69(28.2)                                 |
| Worry that COVID-19 vaccines will affect ART efficacy                          | 124(50.6)                                |

|                                                                                                        |           |
|--------------------------------------------------------------------------------------------------------|-----------|
| I don't think I will get COVID-19                                                                      | 74(30.2)  |
| Too expensive                                                                                          | 11(4.5)   |
| Others                                                                                                 | 45(18.4)  |
| <b>Would you like to receive the COVID-19 vaccine if it was freely accessible in China?</b>            |           |
| Yes                                                                                                    | 55(22.5)  |
| No                                                                                                     | 165(67.3) |
| Unknown                                                                                                | 25(10.2)  |
| <b>Would you accept the COVID-19 vaccination if most people have already been vaccinated in China?</b> |           |
| Yes                                                                                                    | 68(27.8)  |
| No                                                                                                     | 152(62.0) |
| Unknown                                                                                                | 25(10.2)  |
| Non-WTV: unwillingness to vaccination                                                                  |           |

**Table 6** Univariate and multivariate analysis for the influencing factors on the willingness to vaccination for 903 subjects in the survey

| <b>Variables</b>                                                            | <b>WTV Group<br/>No. (%) (n=658)</b> | <b>Non-WTV Group<br/>No. (%) (n=245)</b> | <b>OR(95%CI)</b>   | <b>P-Value</b> | <b>Adjusted<br/>OR(95%CI)</b> | <b>P-Value</b> |
|-----------------------------------------------------------------------------|--------------------------------------|------------------------------------------|--------------------|----------------|-------------------------------|----------------|
| <b>Ethnicity</b>                                                            |                                      |                                          |                    |                |                               |                |
| Han                                                                         | 390 (59.3)                           | 174 (71.0)                               | Ref                |                | Ref                           |                |
| Zhuang                                                                      | 259 (39.4)                           | 69 (28.2)                                | 1.675(1.216-2.306) | 0.002          | 1.653(1.109-2.465)            | 0.014          |
| Other Minorities                                                            | 9 (1.4)                              | 2 (0.8)                                  | 2.008(0.429-9.389) | 0.376          | 4.196(0.798-22.073)           | 0.09           |
| <b>Highest level of education</b>                                           |                                      |                                          |                    |                |                               |                |
| Primary school or below                                                     | 207 (31.5)                           | 125 (51.0)                               | Ref                |                | Ref                           |                |
| Middle school                                                               | 328 (49.8)                           | 97 (39.6)                                | 2.042(1.487-2.804) | <0.001         | 1.747(1.170-2.608)            | 0.006          |
| High school or above                                                        | 123 (18.7)                           | 23 (9.4)                                 | 3.229(1.964-5.311) | <0.001         | 2.492(1.326-4.682)            | 0.005          |
| <b>Do you think COVID-19 vaccination is helpful to control the pandemic</b> |                                      |                                          |                    |                |                               |                |
| Yes, large or very large                                                    | 566 (86.0)                           | 146 (59.6)                               | Ref                |                | Ref                           |                |
| May be helpful                                                              | 19 (2.9)                             | 28 (11.4)                                | 0.175(0.095-0.322) | <0.001         | 0.437(0.209-0.914)            | 0.028          |
| No, little or very little                                                   | 5 (0.8)                              | 4 (1.6)                                  | 0.322(0.086-1.216) | 0.095          | 1.851(0.304-11.282)           | 0.504          |
| Unknown                                                                     | 68 (10.3)                            | 67 (27.3)                                | 0.262(0.178-0.384) | <0.001         | 0.936(0.532-1.647)            | 0.818          |
| <b>Do you think COVID-19 vaccination is safety?</b>                         |                                      |                                          |                    |                |                               |                |
| Yes, large or very large                                                    | 562 (85.4)                           | 129 (52.7)                               | Ref                |                | Ref                           |                |
| No, little or very little                                                   | 5 (0.8)                              | 15 (6.1)                                 | 0.077(0.027-0.214) | <0.001         | 0.082(0.024-0.282)            | <0.001         |
| Unknown                                                                     | 91 (13.8)                            | 101 (41.2)                               | 0.207(0.147-0.291) | <0.001         | 0.381(0.233-0.624)            | <0.001         |
| <b>Which type of COVID-19 vaccine is better?</b>                            |                                      |                                          |                    |                |                               |                |
| Domestic vaccine                                                            | 492 (74.8)                           | 110 (44.9)                               | Ref                |                | Ref                           |                |

|                                                                 |            |            |                    |        |                    |        |
|-----------------------------------------------------------------|------------|------------|--------------------|--------|--------------------|--------|
| Foreign/Imported vaccine                                        | 21 (3.2)   | 11 (4.5)   | 0.427(0.200-0.911) | 0.028  | 0.644(0.270-1.537) | 0.322  |
| No difference                                                   | 34 (5.2)   | 17 (6.9)   | 0.447(0.241-0.829) | 0.011  | 0.669(0.322-1.389) | 0.281  |
| Unknown                                                         | 111 (16.9) | 107 (43.7) | 0.232(0.166-0.325) | <0.001 | 0.487(0.305-0.776) | 0.002  |
| <b>Is COVID-19 vaccination effective for HIV/AIDS patients?</b> |            |            |                    |        |                    |        |
| Yes                                                             | 181 (27.5) | 40 (16.3)  | Ref                |        | Ref                |        |
| No                                                              | 6 (0.9)    | 16 (6.5)   | 0.083(0.031-0.225) | <0.001 | 0.093(0.030-0.287) | <0.001 |
| No difference                                                   | 78 (11.9)  | 21 (8.6)   | 0.821(0.454-1.482) | 0.513  | 0.851(0.427-1.697) | 0.647  |
| Unknown                                                         | 393 (59.7) | 168 (68.6) | 0.517(0.351-0.761) | 0.001  | 0.785(0.486-1.268) | 0.322  |
